# Supplementary material
Source: HighWire-hosted journal article supplement (https://drc.bmj.com/content/suppl/2014/09/24/2.1.e000038)
Supplement: bmjdrc-2014-000038supp_Table.pdf [file bmjdrc-2014-000038supp_Table.pdf]

**Supplemental Table 1. Tertile Comparisons P-values for Glucose and Log(Insulin) Responses During OGTT (N = 217)**

| Minutes | Glucose   |           |           | Log(Insulin) |           |           |
|---------|-----------|-----------|-----------|--------------|-----------|-----------|
|         | T1 vs. T2 | T1 vs. T3 | T2 vs. T3 | T1 vs. T2    | T1 vs. T3 | T2 vs. T3 |
| 0       | 0.48      | 0.49      | 0.98      | 0.0011       | 0.034     | 0.26      |
| 30      | 0.051     | 0.019     | 0.71      | 0.64         | 0.42      | 0.75      |
| 60      | <0.0001   | <0.0001   | 0.22      | 0.29         | 0.45      | 0.76      |
| 90      | 0.0010    | 0.0005    | 0.89      | 0.025        | 0.063     | 0.70      |
| 120     | 0.0003    | 0.0017    | 0.62      | 0.0049       | 0.089     | 0.26      |
